1 B cell receptor crosslinking can augment T cell help-mediated germinal center B cell  
2 selection.

3

4 Jackson S. Turner, Fang Ke, Irina L. Grigorova

5

6

7 University of Michigan Medical School

8

9 Please address correspondence to:

10 Irina Grigorova

11 1150 W. Medical Center Dr

12 6748 MSII

13 Ann Arbor, MI 48109

14 (734) 615-3882 (p)

15 (734) (734) 764-3562 (f)

16 [igrigor@umich.edu](mailto:igrigor@umich.edu)

17

18

19

20

21

22

23

24

25

26

27

28

29

30

31

32

## 33 **Abstract**

34            Selection of germinal center (GC) B cells with B cell receptors (BCR) possessing high  
35 affinity to foreign antigen (Ag) and their differentiation into antibody-secreting long-lived  
36 plasma cells is critical for potent long-term humoral immunity. Ag-dependent engagement of GC  
37 B cell BCR triggers Ag internalization and loading of antigenic peptides on MHCII molecules  
38 for presentation to follicular helper T cells (Tfh) and acquisition of T cell help. However,  
39 whether it also provides signals that are critical or synergistic with T cell help for GC B cell  
40 selection and differentiation *in vivo* is not known. Here we show that T cell help is sufficient to  
41 induce GC B cell expansion and plasmablast (PB) formation in the absence of recurrent BCR  
42 engagement with Ag. Ag-mediated BCR crosslinking on the other hand is not sufficient to  
43 promote GC B cell selection, but can synergize with T cell help to enhance the GC B cell and PB  
44 responses when T cell help is limiting.

45

## 46 **Introduction**

47            GCs are distinct sites within B cell follicles in which activated B cells undergo affinity  
48 maturation and can differentiate into memory B cells and long-lived plasma cells (Victora and  
49 Nussenzweig, 2012). The GC is characteristically polarized into the dark zone (DZ) and the light  
50 zone (LZ). The LZ contains Tfh cells and follicular dendritic cells (FDCs) on which antigen (Ag)  
51 is deposited for acquisition by GC B cells. GC B cells with higher affinity for Ag undergo  
52 selection in the LZ and then move into the DZ where they proliferate and undergo somatic  
53 hypermutation (Allen et al., 2007, Victora et al., 2010, Victora and Nussenzweig, 2012),  
54 Through ubiquitination and rapid degradation of MHCII-Ag complexes, they refresh their pool  
55 of MHCII molecules and reenter into the LZ for another round of Ag acquisition and

56 presentation (Bannard et al., 2016, Victora et al., 2010, Mesin et al., 2016). Affinity-based  
57 selection of GC B cells is based on competition for Ag and T cell help, but the individual roles of  
58 the signals provided by BCR engagement and T-cells in promoting selection are not fully  
59 understood (Shlomchik and Weisel, 2012). Several studies have examined the effect of  
60 increasing T cell help to GC B cells independently of BCR cross-linking by taking advantage of  
61 the fact that GC B cells express high levels of DEC-205, a cell-surface lectin that delivers Ags it  
62 binds to MHCII loading compartments (Bonifaz et al., 2002, Victora et al., 2010). These studies  
63 found that upon administration of DEC-205 antibodies conjugated to T cell Ag ( $\alpha$ DEC-Ag),  
64 high-affinity GC B cells deficient for DEC-205 were outcompeted by those that expressed the  
65 lectin. They also showed that administration of  $\alpha$ DEC-Ag during GC responses increased the  
66 rate of GC B cell proliferation and hypermutation in a dose-dependent fashion, and promoted  
67 formation of PB (precursors of plasma cells) (Victora et al., 2010, Gitlin et al., 2014, Gitlin et al.,  
68 2015). These results suggest that competition for T cell help can drive GC B cell selection.  
69 However, recipient mice in these studies were immunized with B cell cognate Ag to initiate GC  
70 responses, raising the possibility that integration with signals from BCR engagement with Ag is  
71 necessary for  $\alpha$ DEC-Ag-mediated enhancement of GC responses.

72         Indeed, recent evidence supports an important role for BCR engagement in promoting  
73 GC B cell selection and differentiation into PBs, despite the inhibition of the BCR signaling  
74 pathway in GC B cells (Khalil et al., 2012, Mueller et al., 2015, Nowosad et al., 2016). One  
75 study found that blocking GC B cells' ability to acquire Ag inhibited initial PB differentiation  
76 more effectually than blockade of CD40 or depletion of Tfh cells (Krautler et al., 2017).  
77 Additionally, a recent study found that the signaling pathways downstream of both BCR and  
78 CD40, a critical ligand for mediating T cell help to GC B cells, are altered in GC B cells

79 compared to naïve B cells such that stimulation through both is required for efficient induction of  
80 Myc, a critical driver of B cell proliferation (Luo et al., 2018). These findings suggest that  
81 although BCR signaling pathways are attenuated in GC B cells, they may nevertheless play a  
82 critical role in GC B cell selection and differentiation. However, the direct impact of Ag-  
83 dependent BCR engagement on GC B cells' expansion or differentiation into antibody-secreting  
84 PBs could not be determined due to the difficulty of controlling GC B cells' acquisition of Ag *in*  
85 *vivo*.

86 We recently described an experimental system that enables B cells to participate in GCs  
87 after a single transient acquisition of Ag (Turner et al., 2017c). Here we adapted it to recruit B  
88 cells into GCs and provide them with the means to acquire potential positive selection signals  
89 from BCR crosslinking or T cell help independently or in combination to examine the  
90 contributing roles of both signals to GC B cell survival, selection, and effector differentiation.  
91 We found that T cell help is sufficient to promote GC B cell expansion and PB differentiation in  
92 the absence of Ag-mediated BCR crosslinking. Conversely, Ag engagement of BCRs is  
93 insufficient to promote GC B cell selection in the absence of T cell help, but is able to  
94 synergistically enhance the GC B cell and PB responses when T cell help is limiting.

95

## 96 **Results and Discussion**

97 To address the individual roles for antigen (Ag)-driven BCR cross-linking and T cell help  
98 in promoting GC B cell selection and effector differentiation, purified Hy10 Ig-Tg B cells (with  
99 BCRs specific to duck egg lysozyme, DEL) were first incubated *ex vivo* for 5 minutes with 50  
100 µg/mL of DEL-OVA (DEL conjugated to ovalbumin, OVA), washed extensively, and  
101 transferred into recipient mice in which OTII Th cells were activated 3d before by immunization

102 with OVA in complete Freund's adjuvant (CFA) (**Fig. 1A**). As we have shown before, transient  
103 Ag acquisition *ex vivo* and cognate T cell help *in vivo* enable Ig-Tg B cells' proliferation and  
104 participation in GCs, with recruitment into GCs starting by 4d post transfer (d.p.t) (**Fig. S1A-C**,  
105 (Turner et al., 2017c)). At this time point, due to the lack of cognate DEL Ag in the OVA-  
106 immunized recipient mice, Ig-Tg B cells should not receive any stimulation via Ag-dependent  
107 BCR cross-linking. In addition, prior to their differentiation into GC B cells, Ig-Tg cells undergo  
108 extensive proliferation (**Fig. S1C**), diluting the Ag peptides acquired during the *ex vivo* pulsing  
109 with DEL-OVA. Due to this dilution, the Ig-Tg B cells recruited into GCs are likely to present  
110 substantially lower amounts of OVA peptides than endogenous OVA-specific GC B cells, which  
111 can reacquire Ag *in vivo*. To summarize, by 4 d.p.t. Ig-Tg cells convert into GC B cells that are  
112 not subjected to Ag-dependent BCR crosslinking and should poorly compete for help from  
113 OVA-specific Tfh cells within GCs.

114 To address whether BCR cross-linking is sufficient to promote GC B cell expansion or  
115 the plasma cell response, at 4 d.p.t. of DEL-OVA-pulsed Ig-Tg B cells the recipient mice were  
116 re-immunized with 50 µg of multivalent DEL (mDEL) in incomplete Freund's adjuvant (IFA) or  
117 with PBS in IFA for negative control (**Fig. 1A**). While mDEL could engage Ig-Tg GC B cells'  
118 BCRs, they should not provide additional Ag peptides to present to OVA-specific Tfh cells. As  
119 positive controls, recipient mice received DEL-OVA in IFA to provide both additional BCR  
120 cross-linking of Ig-Tg GC B cells, as well as peptides to present to OVA-specific Tfh cells. Of  
121 note, in *ex vivo* stimulation assays, mDEL and DEL-OVA induce similar Ig-Tg BCR cross-  
122 linking and internalization (Turner et al., 2017). Draining inguinal LNs (dLNs) were collected 2  
123 and 4d after re-immunization, and Ig-Tg GC B cells and PB were measured by flow cytometry  
124 (**Fig. 1A**, for gating see **Fig. S1A, D**). No increase in Ig-Tg GC or PB accumulation was detected

125 after reimmunization of mice with mDEL compared to PBS control. However, a significant  
126 accumulation of Ig-Tg GC B cells and PBs was observed in DEL-OVA reimmunized recipients  
127 (**Fig. 1B, C, Fig. S1E**). These data suggest that elevated presentation of OVA peptides for  
128 acquisition of T cell help is necessary to promote Ig-Tg GC B cell selection and formation of  
129 PBs, while crosslinking of GC BCRs by itself is not sufficient.

130 While this finding is consistent with a well-established requirement of T cell help for GC  
131 response (Takahashi et al., 1998, Victora et al., 2010), it does not discriminate whether Ag-  
132 dependent BCR engagement is necessary for GC B cells in any other way than for deposition of  
133 Ag peptides on MHCII. A recent study suggested that combination of BCR signaling and T cell  
134 help may be required for GC B cell proliferation and selection (Luo et al., 2018). We therefore  
135 next asked whether T cell help was sufficient to promote GC B cell cycling and PB accumulation  
136 *in vivo*, or whether BCR cross-linking was also required. To address this question, we used  
137  $\alpha$ DEC-205 antibodies to target Ag to MHCII loading compartments in GC B cells, as previously  
138 described (Victora et al., 2010). Binding to the lectin DEC-205, which is upregulated on GC B  
139 cells, enables Ag to be loaded on MHCII without engaging the BCR (Victora et al., 2010). We  
140 conjugated the OVA peptide 323-339 (OVAp), which contains the OTII T cell epitope of OVA,  
141 to  $\alpha$ DEC-205 or isotype control antibodies ( $\alpha$ DEC-OVAp, iso-OVAp). DEL-OVA pulsed Ig-Tg  
142 B cells were recruited into GCs as above and at 4 d.p.t. recipient mice were reimmunized with  
143 PBS in IFA and s.c. injected with  $\alpha$ DEC-OVAp or iso-OVAp to drain to inguinal LNs (**Fig. 1D**).  
144 Of note, both Ig-Tg and endogenous GC B cells express DEC-205 and would receive additional  
145 OVAp to present for T cell help upon administration of  $\alpha$ DEC-OVAp. Significant increases in  
146 Ig-Tg GC B cell and PB accumulation were observed at 4d post administration of  $\alpha$ DEC-OVAp,  
147 suggesting that elevated presentation of OVA peptides by GC B cells may be sufficient to induce

148 their selection and differentiation in the absence of additional crosslinking of BCRs (**Fig. 1E, F,**  
149 **Fig. S1F**).

150 To verify that the observed results were not due to the transfer of small amounts of Ag by  
151 the DEL-OVA-pulsed Ig-Tg B cells *in vivo*, we significantly reduced the amount of Ag initially  
152 acquired by Ig-Tg B cells by pulsing them *ex vivo* with only 0.5µg/mL of DEL-OVA which is  
153 slightly above the threshold dose required for BCR-driven activation of Ig-Tg B cells (Turner et  
154 al., 2017c). To further minimize the potential for Ag transfer, the number of DEL-OVA pulsed  
155 Ig-Tg B cells transferred to recipient mice was reduced to  $10^5$ , of which the vast majority  
156 localizes to the spleens rather than peripheral LNs (Turner et al., 2017c). As before, DEL-OVA  
157 pulsed Ig-Tg B cells were extensively washed and transferred into OVA-immunized recipient  
158 mice in which activated OTII Th cells were present. 4 days later the recipients were reimmunized  
159 with PBS in IFA and injected with 0.05-10 µg of αDEC-OVAp or with 10µg iso-OVAp as  
160 negative controls (**Fig. 1G**). To compare the rescue of Ig-Tg GC and PB response by αDEC-  
161 OVAp administration to a more conventional immunization scenario, we also assessed the  
162 kinetics of Ig-Tg B cell participation in the GC and PB response in mice immunized with DEL-  
163 OVA, where transferred Ag-pulsed cells could reacquire cognate Ag *in vivo* (**Fig. 1H**). Draining  
164 LNs were collected at various times and Ig-Tg GC participation and PB accumulation were  
165 analyzed (**Fig. 1G, H**). As previously described, at 4 d.p.t. Ag-pulsed Ig-Tg B cells were  
166 similarly recruited into GC and PB responses in OVA or DEL-OVA immunized mice (**Fig. 1I-**  
167 **K**) (Turner et al., 2017b, Turner et al., 2017c). However, 4 days later Ig-Tg B cells started to  
168 drop out of GCs in the OVA-immunized mice. In contrast, in DEL-OVA immunized mice they  
169 expanded to around 10% of total GC B cells (**Fig. I, J**). Ig-Tg PB production was maximized in  
170 DEL-OVA immunized mice at 6 d.p.t. (**Fig. 1K**). In the OVA-immunized mice (**Fig. 1G**)

171 administration of  $\alpha$ DEC-OVAp led to dose-dependent rescue of Ig-Tg GC and PB responses  
172 (**Fig. 1L-N**). Ig-Tg B cell fraction in GCs was maximized at around 10% at 3  $\mu$ g of  $\alpha$ DEC-  
173 OVAp (**Fig. 1L, M**). Of note, Tfh cell response was largely consistent across various amounts of  
174  $\alpha$ DEC-OVAp administered, except of the highest 10  $\mu$ g dose of  $\alpha$ DEC-OVAp when a trend  
175 towards a larger Tfh cell population was observed (**Fig. S1G, H**). To control for potential effects  
176 of  $\alpha$ DEC-205 ligation independent of Ag loading, we analyzed the Ig-Tg GC and PB response at  
177 3 days after the administration of the intermediate 0.5  $\mu$ g dose of  $\alpha$ DEC-OVAp compared to the  
178 iso-OVAp or unconjugated  $\alpha$ DEC205 negative controls (**Fig. 1O**). As expected, only when  
179 conjugated to OVAp,  $\alpha$ DEC205 induced augmented cycling of Ig-Tg GC B cells as based on the  
180 ratio of the dark zone (DZ) to light zone (LZ) GC B cells (**Fig. S1I, Fig. 1P, Q**) and an overall  
181 increase in the Ig-Tg GC response (**Fig. 1R**), while the endogenous GC response was not  
182 affected (**Fig. S1L**). Of note, at 2 d post  $\alpha$ DEC-OVAp administration Ig-Tg B cell cycling was  
183 not yet elevated (**Fig. S1P, Q**), presumably due to some time required for Ig-Tg cells to integrate  
184 T cell help when OVAp peptide is loaded through DEC205 binding onto both Ig-Tg and  
185 endogenous GC B cells. To analyze both the Ig-Tg and endogenous PB responses we performed  
186 intracellular staining with anti pan-Ig, which yields similar numbers for Ig-Tg PBs as  
187 intracellular HEL staining and enables quantification of endogenous PBs (**Fig. S1D, J, K**). In  
188 addition, by gating on the Fas<sup>+</sup> CD38<sup>lo</sup> Ig<sup>high</sup> cells, we identified the PB that recently originated  
189 from GCs (GCPB, **Fig. S1O**, (Krautler et al., 2017)). We found that  $\alpha$ DEC-OVAp administration  
190 leads to an increase in the total Ig-Tg PB, as well as GCPB response, while the endogenous PB  
191 response is not significantly elevated (**Fig. 1S, T, Fig. S1M, N**). Given that DEC205 is expressed  
192 on both endogenous and Ig-Tg GC B cells, the selective increase in Ig-Tg GC and GCPB  
193 responses following  $\alpha$ DEC-OVAp administration indicates that this treatment narrows the



194 difference in the amount of OVA<sub>p</sub> presented by Ig-Tg and endogenous GC B cells, enabling  
195 them to more successfully compete for T cell help over time (**Fig. 1G-N**). Altogether these  
196 results indicate that GC and PB responses are enhanced when GC B cells receive additional  
197 sources of peptide to present for T cell help, and suggest that Ag-dependent BCR engagement is  
198 not absolutely required to promote GC B cell expansion or PB formation.

199         We then addressed whether Ag-mediated BCR cross-linking may be able to enhance GC  
200 B cell selection or PB differentiation in combination with saturating or sub-saturating amounts of  
201 T cell help. To test that, Ig-Tg B cells were recruited into GCs as above, and the recipient mice  
202 were injected with 0.5 $\mu$ g or 10 $\mu$ g  $\alpha$ DEC-OVA<sub>p</sub> and reimmunized with PBS or 50  $\mu$ g mDEL in  
203 IFA. As negative controls, mice received isotype-OVA<sub>p</sub> (**Fig. 2A**). Draining LNs were analyzed  
204 3d later. The Ig-Tg GC and PB responses were not enhanced following re-immunization with  
205 mDEL compared to PBS in recipients that received either isotype-OVA<sub>p</sub> or 10 $\mu$ g  $\alpha$ DEC-OVA<sub>p</sub>,  
206 suggesting that BCR crosslinking does not promote GC B cell selection in the absence of T cell  
207 help or in the presence of saturating T cell help (**Fig. 2B-E, J-M**). Interestingly, in the absence of  
208 additional peptide presentation for Tfh cells, administration of 50  $\mu$ g of mDEL led to modest  
209 reduction in Ig-Tg GC B cells (**Fig. 2C**, isotype-OVA<sub>p</sub>), which was reversed when GC B cells  
210 were presenting some cognate peptides for T cell help (**Fig. 2G, K**,  $\alpha$ DEC-OVA<sub>p</sub>). The observed  
211 effect is consistent with previous studies where acute administration of a large dose of cognate to  
212 BCR Ag (or membrane-associated presentation of cognate self-Ag in proximity to GCs) reduced  
213 the numbers of GC B cells (Pulendran et al., 1995, Shokat and Goodnow, 1995, Silva et al.,  
214 2017, Chan et al., 2012). Based on the previous studies and our work (Turner et al., 2017a), we  
215 speculate that receiving BCR signaling in the absence of sufficient T cell help may purge GC B  
216 cells from prolonged “hanging on” participation in GCs.

217 In contrast, after administration of an intermediate dose of  $\alpha$ DEC-OVAp (0.5 $\mu$ g) that by  
218 itself led to only a modest increase in Ig-Tg responses (**Fig. 1L, N**), re-immunization with mDEL  
219 in IFA led to accumulation of Ig-Tg GC and PB compared to PBS in IFA control (**Fig. 2F-I**).  
220 Reimmunization with 10 fold lower dose of mDEL (5  $\mu$ g) also led to robust increases in the Ig-  
221 Tg GC, GCPB and PB responses (**Fig. S2A-F**). Finally, similar trends were obtained when mice  
222 were reimmunized with highly multivalent polystyrene microspheres coated with DEL (sphDEL)  
223 in IFA (**Fig. S2G-J**). These results suggest that Ag-dependent BCR engagement in GC B cells,  
224 while neither sufficient nor necessary for GC B cell selection, can enhance GC and PB responses  
225 in combination with T cell help.

226

227 Our findings are consistent with an *ex vivo* observation that simultaneous engagement of  
228 GC BCRs and CD40 enhances upregulation of Myc in GC B cells which is required for cell  
229 cycling (Luo et al., 2018). However, they suggest that T cell help may be sufficient on its own.  
230 Although CD40 is a critical component of the ‘help’ provided by Tfh cells, other T-cell derived  
231 factors may enable T cell help to promote expansion of GC B cells and formation of PBs  
232 independently of re-engagement of their BCRs with Ag. The importance of T cell help-mediated  
233 factors other than CD40 in promoting GC PB response was also suggested by another study in  
234 which depletion of CD4 T cells during the GC response inhibited PB response more profoundly  
235 than blockade of CD40L (Krautler et al., 2017).

236 Interestingly, the study by Krautler *et al.* also demonstrated that differentiation of PB  
237 from GC B cells was more effectively impeded by blockade of B cells' acquisition of Ag than by  
238 depletion of T cells, suggesting that Ag-dependent BCR cross-linking may play a critical role in  
239 initiating GC B cells' differentiation into PBs. However, whether BCR crosslinking alone may be

240 sufficient to initiate formation of the early PB in the absence of T cell help has not been  
241 explored. We sought to address this question directly using our experimental system to induce  
242 BCR crosslinking and T cell help independently.

243 Early PBs differentiating from GC B cells were previously identified as having a GC  
244 phenotype (CD38<sup>lo</sup>) and intermediate expression of the transcription factor Blimp1 and surface  
245 Ig, whereas later PBs had higher Blimp1 expression and lower surface Ig. Additional  
246 characterization of these populations indicated that early PBs had increased surface expression of  
247 B220 and CD45 compared to more mature PBs (Krautler et al., 2017). Using Blimp1 reporter Ig-  
248 Tg B cells, we identified that B220 downregulation could be used as a surrogate marker of PB  
249 and GCPB maturation, as B220<sup>+</sup> GCPBs expressed lower amounts of Blimp1 and syndecan, and  
250 higher amounts of CD86, surface IgG<sub>1</sub>, and CD45.1 than their B220<sup>lo</sup> counterparts (**Fig. 3A, B,**  
251 **Fig. S3A**). To determine whether BCR cross-linking is sufficient to promote early differentiation  
252 of PBs in GC B cells, Ig-Tg B cells were recruited into the GC response as above, and recipient  
253 mice were injected with 0.5μg isotype-OVAp or αDEC-OVAp. The recipient mice were then  
254 reimmunized with PBS, mDEL, or sphDEL in IFA, and the GC PB response was measured 1 and  
255 2d later (**Fig. 3C, D**). We found that BCR crosslinking alone was insufficient to increase  
256 accumulation of early GCPBs, independently of whether moderately multivalent Ag mDEL or  
257 highly multivalent sphDEL were used for reimmunization (**Fig. 3E-G**). Of note, when analysis  
258 of early PB differentiation was confined to the IgG<sub>1</sub><sup>+</sup>-cells we detected a potential increase in the  
259 early Ig-Tg PBs at 2d following reimmunization with highly multivalent sphDEL (**Fig. S3B**). If  
260 confirmed, these results could indicate an isotype-dependent sensitivity of GC B cells to highly  
261 multivalent Ag. Alternatively, the increase in these cells could represent increased class  
262 switching to IgG<sub>1</sub> in response to highly multivalent Ag. Finally, at 1-2 days after reimmunization

263 we detected no increase in the total or DZ Ig-Tg GC B cells in response to BCR crosslinking  
264 alone, independently of their class-switching to IgG<sub>1</sub> (**Fig. 3H, Fig. S3C, D, data not shown**).

265 In contrast, in the presence of subsaturating amounts of  $\alpha$ DEC205-OVAp, BCR  
266 crosslinking promoted Ig-Tg early GCPB responses, as well as Ig-Tg GC B cell expansion and  
267 accumulation in the DZ (**Fig. 3I-L, Fig. S3E-G**). At the same time no accumulation of non-  
268 GCPB has been observed (**Fig. 3A, Fig. S3H-K**). Therefore, in the presence of subsaturating T  
269 cell help, Ag-dependent BCR crosslinking can promote increased differentiation of GC B cells  
270 into PBs and induce an increase in GC B cell expansion. Overall, our findings are consistent with  
271 the previously discovered role of Ag-dependent BCR engagement in driving GC differentiation  
272 into PB. However, while in the previous study T cell help has been shown to be critical for  
273 maturation and survival of the early GCPB (Krautler et al., 2017), our findings are more  
274 consistent with another study (Ise et al., 2018) and suggest that an ongoing T cell help is  
275 required, even for the initial differentiation of GC B cells into PBs.

276 To summarize, in this study we found that BCR crosslinking is not sufficient to promote  
277 GC B cell expansion, selection or differentiation into PB. In contrast, acquisition of T cell help is  
278 sufficient to induce GC B cell expansion and PB formation even in the absence of BCR  
279 engagement with Ag (**Fig. 4**). These findings are consistent with a recent study which showed  
280 that in the presence of abundant T cell help, non-Ag specific B cells could participate in GCs and  
281 persist long enough to acquire specificity to Ag (Silver et al., 2018).

282 Although loading GC B cells with T cell Ag peptides was sufficient to promote their  
283 selection and PB differentiation in a dose-dependent fashion (**Fig. 1G, H**, (Gitlin et al., 2014)),  
284 we found that Ag-dependent BCR engagement potentiated GC B cell expansion and PB  
285 differentiation when the amount of T cell Ag peptide loaded was subsaturating (**Fig. 4**). The

286 dynamics of GC B cells' acquisition of Ag and T cell help *in vivo* are not completely understood.  
287 It is possible that when Ag is abundant, LZ GC B cells may reacquire Ag multiple times from  
288 FDCs and make serial productive contacts with Tfh cells that efficiently induce Myc and  
289 promote selection and differentiation. However, when Ag becomes more limiting, BCR signaling  
290 induced by Ag engagement is likely to be temporally separated from T cell help due to the time  
291 required for Ag digestion, MHCII loading and efficient competition with other GC B cells for T  
292 cell help. While BCR signaling was shown to induce transient nuclear exclusion of Foxo1 (a  
293 suppressor of Myc) in GC B cells *ex vivo*, it starts to decline 20 minutes after BCR engagement  
294 (Luo et al., 2018). Therefore, GC B cells are likely to have a very short window of time  
295 following Ag acquisition in which they need to acquire T cell help to synergistically induce Myc.  
296 Sufficiency of T cell help for GC B cell selection relieves this time constraint and ensures that  
297 GC B cell selection can continue when Ag reacquisition from FDCs becomes more limiting.  
298 While CD40 induces only minor upregulation of Myc *ex vivo*, additional factors produced by Tfh  
299 cells, such as BAFF, ICOS, and IL-21 may be sufficient to promote GC B cell selection and  
300 effector differentiation *in vivo* (Han et al., 1995, Ding et al., 2013, Goenka et al., 2014). Other  
301 factors promoting GC B cells' survival or differentiation can also be provided by FDCs (e.g.  
302 BAFF, IL-6, complement fragments, and adhesion molecules) (El Shikh et al., 2010, Victoratos  
303 et al., 2006) or toll-like receptor ligands and could synergize with T cell help in the absence of  
304 Ag-dependent BCR engagement (Wang et al., 2011, Garin et al., 2010, Rookhuizen and  
305 DeFranco, 2014).

306 Overall, our current study suggests a dual role of BCR signaling and T cell help for GC B  
307 cell response *in vivo* with T cell help playing the dominant role and Ag-dependent BCR  
308 crosslinking enhancing GC B cell selection and differentiation into plasma cells (**Fig. 4**).

## 309 **Materials and Methods**

310 **Mice.** B6 (C57BL/6) and B6-CD45.1 (Ptprc<sup>a</sup> Pepc<sup>b</sup>/BoyJ) mice were purchased from  
311 Charles River or the Jackson Laboratory. Blimp1<sup>yfp</sup> (Prdm1-EYFP) mice were purchased from  
312 the Jackson Laboratory. BCR transgenic (Ig-Tg) Hy10 mice and TCR transgenic OTII mice were  
313 generously provided by Jason Cyster (Allen et al., 2007, Barnden et al., 1998). Hy10 mice were  
314 crossed with B6-CD45.1 and Blimp1<sup>yfp</sup> mice. All mice were maintained in specific pathogen free  
315 environments and protocols were approved by the Institutional Animal Care and Use Committee  
316 of the University of Michigan.

317 **Antigen preparation and antibody conjugation.** Duck eggs were locally purchased and  
318 lysozyme was purified as previously described (Allen et al., 2007). Ovalbumin (OVA) was  
319 purchased from Sigma. Duck egg lysozyme (DEL) was conjugated to OVA via glutaraldehyde  
320 cross-linking as previously described (Allen et al., 2007). For production of multimeric DEL  
321 (mDEL), purified DEL was conjugated to biotin at a 1:2 molar ratio using biotin-X NHS-ester  
322 (Pierce) according to the manufacturer's directions and incubated with purified streptavidin  
323 (Thermo Scientific) at a 10:1 molar ratio for 30 minutes on ice, followed by removal of unbound  
324 DEL-bio by passage through a 30 kDa molecular weight cut-off desalting column (Bio-Rad).

325 For generation of DEL-coated microspheres (sphDEL), 0.11  $\mu$ m streptavidin coated  
326 polystyrene microspheres (Bangs Laboratories) were diluted into PBS and combined with a  
327 saturating amount of DEL-bio as described previously (Eckl-Dorna and Batista, 2009)

328 For generation of  $\alpha$ DEC-OVAp and iso-OVAp, purified DEC-205 (NLDC-145) and rat  
329 IgG2a isotype control antibodies were purchased from Biolegend and partially reduced with 50  
330 mM 2-mercaptoethylamine (2-MEA) in PBS, 10 mM EDTA for 90 minutes at 37° C. 2-MEA  
331 was removed by passage through 30 kDa molecular weight cut-off desalting columns (Bio-Rad),

332 and half-IgGs were incubated with a 9-fold molar excess of maleimide-substituted OVA peptide  
333 323-339 (Genscript) for 2h at 4° C. Unbound peptide was removed by passage through 30 kDa  
334 molecular weight cut-off desalting columns (Bio-Rad) and conjugation was verified by SDS-  
335 PAGE.

336 **Adoptive transfer and immunization.** Spleens were harvested from male donor OTII  
337 mice and pressed through 70µm nylon cell strainers (Falcon) in DMEM (Cellgro) supplemented  
338 with 2% FBS (Atlanta Biologicals), 10 mM HEPES, 50 IU/mL of penicillin, and 50 µg/mL of  
339 streptomycin (HyClone). Splenocytes were centrifuged for 7 minutes at 380 rcf, 4° C and  
340 resuspended in 0.14 M NH<sub>4</sub>Cl in 0.017 M Tris buffer, pH 7.2 for erythrocyte lysis, washed twice  
341 with DMEM supplemented as above, and counted using a Cellometer Auto X4 (Nexcelom). The  
342 fraction of CD19<sup>-</sup> CD8<sup>-</sup> CD4<sup>+</sup> Vβ5<sup>+</sup> (OTII) splenocytes was determined by flow cytometry, and  
343 the indicated number of OTII cells were transferred i.v. to male recipient mice. Ig-Tg B cells  
344 were enriched from male or female donor mice by negative selection as previously described  
345 (Allen et al., 2007). For transient exposure to Ag, purified Ig-Tg B cells were incubated with the  
346 indicated concentration of DEL-OVA *ex vivo* for 5 minutes at 37° C, washed four times with  
347 DMEM supplemented as above, and transferred i.v. to recipient mice. Where indicated, recipient  
348 mice were immunized s.c. in the flanks and base of tail with 50 or 5 µg of the indicated Ag  
349 emulsified in complete or incomplete Freund's adjuvant (Sigma), prepared according to the  
350 manufacturer's directions. Where indicated, recipient mice were injected s.c. in the base of tail  
351 with unconjugated αDEC-205, αDEC-OVAp or iso-OVAp in PBS.

352 **Flow cytometry.** The following antibodies specific to B220 (RA3-6B2), CD19 (1D3),  
353 CD95 (Jo2), IgG1 (A85-1), IgG1a (10.9), rat IgG1 isotype control (R3-34) from BD-  
354 Pharmingen; CD4 (RM-45), CD45.1 (A20), CD45.2 (104), CD86 (GL-1), IgD (11-26c.2a), CD3

355 (17A2), CD197 (4B12), CD279 (RMP1-30), TCR V $\beta$ 5 (MR9-4) from Biolegend; CD-8 (53-6.7),  
356 CXCR5 (2G8), CD138 (281.2) from BD Bioscience, CD38 (90), GL-7 (GL-7), CXCR4 (2B11)  
357 from eBioscience have been used for flow cytometry analysis. Single-cell suspensions from  
358 draining lymph nodes were incubated with biotinylated antibodies for 20 minutes on ice, washed  
359 twice with 200  $\mu$ l FACS buffer (2% FBS, 1mM EDTA, 0.1% NaN<sub>3</sub> in PBS), incubated with  
360 fluorophore-conjugated antibodies and streptavidin (SA-Qdot 605, SA-Alexa647 from Life  
361 technologies; SA-Dylight 488 from Biolegends) for 20 minutes on ice, washed twice more with  
362 200  $\mu$ l FACS buffer, and resuspended in FACS buffer for acquisition. For intracellular staining,  
363 surface-stained cells were fixed and permeabilized for 20 minutes on ice with BD  
364 Cytofix/Cytoperm buffer, washed twice with 200  $\mu$ l BD Perm/Wash buffer, incubated with  
365 Alexa 647-conjugated HEL or polyclonal goat anti-Ig(H+L) from Southern Biotech for 20  
366 minutes on ice, followed by two more washes with 200  $\mu$ l Perm/Wash buffer, and resuspended in  
367 FACS buffer for acquisition. Cells were acquired on a FACSCanto, and data was analyzed using  
368 FlowJo (TreeStar).

369 **Statistics.** Statistical tests were performed as indicated using Prism 7 (GraphPad).  
370 Differences between groups not annotated by an asterisk did not reach statistical significance. No  
371 blinding or randomization was performed for animal experiments, and no animals or samples  
372 were excluded from analysis.

373

374

375

376

377



378 **References:**

- 379 ALLEN, C. D., OKADA, T., TANG, H. L. & CYSTER, J. G. 2007. Imaging of germinal center  
380 selection events during affinity maturation. *Science*, 315, 528-31.
- 381 BANNARD, O., MCGOWAN, S. J., ERSCHING, J., ISHIDO, S., VICTORA, G. D., SHIN, J.  
382 S. & CYSTER, J. G. 2016. Ubiquitin-mediated fluctuations in MHC class II facilitate  
383 efficient germinal center B cell responses. *J Exp Med*, 213, 993-1009.
- 384 BARNDEN, M. J., ALLISON, J., HEATH, W. R. & CARBONE, F. R. 1998. Defective TCR  
385 expression in transgenic mice constructed using cDNA-based alpha- and beta-chain genes  
386 under the control of heterologous regulatory elements. *Immunol Cell Biol*, 76, 34-40.
- 387 BONIFAZ, L., BONNYAY, D., MAHNKE, K., RIVERA, M., NUSSENZWEIG, M. C. &  
388 STEINMAN, R. M. 2002. Efficient targeting of protein antigen to the dendritic cell  
389 receptor DEC-205 in the steady state leads to antigen presentation on major  
390 histocompatibility complex class I products and peripheral CD8+ T cell tolerance. *J Exp*  
391 *Med*, 196, 1627-38.
- 392 CHAN, T. D., WOOD, K., HERMES, J. R., BUTT, D., JOLLY, C. J., BASTEN, A. & BRINK,  
393 R. 2012. Elimination of germinal-center-derived self-reactive B cells is governed by the  
394 location and concentration of self-antigen. *Immunity*, 37, 893-904.
- 395 DING, B. B., BI, E., CHEN, H., YU, J. J. & YE, B. H. 2013. IL-21 and CD40L synergistically  
396 promote plasma cell differentiation through upregulation of Blimp-1 in human B cells. *J*  
397 *Immunol*, 190, 1827-36.
- 398 EL SHIKH, M. E., EL SAYED, R. M., SUKUMAR, S., SZAKAL, A. K. & TEW, J. G. 2010.  
399 Activation of B cells by antigens on follicular dendritic cells. *Trends Immunol*, 31, 205-  
400 11.
- 401 GARIN, A., MEYER-HERMANN, M., CONTIE, M., FIGGE, M. T., BUATOIS, V., GUNZER,  
402 M., TOELLNER, K. M., ELSON, G. & KOSCO-VILBOIS, M. H. 2010. Toll-like  
403 receptor 4 signaling by follicular dendritic cells is pivotal for germinal center onset and  
404 affinity maturation. *Immunity*, 33, 84-95.
- 405 GITLIN, A. D., MAYER, C. T., OLIVEIRA, T. Y., SHULMAN, Z., JONES, M. J., KOREN, A.  
406 & NUSSENZWEIG, M. C. 2015. HUMORAL IMMUNITY. T cell help controls the  
407 speed of the cell cycle in germinal center B cells. *Science*, 349, 643-6.
- 408 GITLIN, A. D., SHULMAN, Z. & NUSSENZWEIG, M. C. 2014. Clonal selection in the  
409 germinal centre by regulated proliferation and hypermutation. *Nature*, 509, 637-40.
- 410 GOENKA, R., MATTHEWS, A. H., ZHANG, B., O'NEILL, P. J., SCHOLZ, J. L., MIGONE, T.  
411 S., LEONARD, W. J., STOHL, W., HERSHBERG, U. & CANCRO, M. P. 2014. Local  
412 BLyS production by T follicular cells mediates retention of high affinity B cells during  
413 affinity maturation. *J Exp Med*, 211, 45-56.
- 414 HAN, S., HATHCOCK, K., ZHENG, B., KEPLER, T. B., HODES, R. & KELSOE, G. 1995.  
415 Cellular interaction in germinal centers. Roles of CD40 ligand and B7-2 in established  
416 germinal centers. *J Immunol*, 155, 556-67.
- 417 ISE, W., FUJII, K., SHIROGUCHI, K., ITO, A., KOMETANI, K., TAKEDA, K.,  
418 KAWAKAMI, E., YAMASHITA, K., SUZUKI, K., OKADA, T. & KUROSAKI, T.  
419 2018. T Follicular Helper Cell-Germinal Center B Cell Interaction Strength Regulates  
420 Entry into Plasma Cell or Recycling Germinal Center Cell Fate. *Immunity*, 48, 702-715  
421 e4.

- 422 KHALIL, A. M., CAMBIER, J. C. & SHLOMCHIK, M. J. 2012. B cell receptor signal  
423 transduction in the GC is short-circuited by high phosphatase activity. *Science*, 336,  
424 1178-81.
- 425 KRAUTLER, N. J., SUAN, D., BUTT, D., BOURNE, K., HERMES, J. R., CHAN, T. D.,  
426 SUNDLING, C., KAPLAN, W., SCHOFIELD, P., JACKSON, J., BASTEN, A.,  
427 CHRIST, D. & BRINK, R. 2017. Differentiation of germinal center B cells into plasma  
428 cells is initiated by high-affinity antigen and completed by Tfh cells. *J Exp Med*, 214,  
429 1259-1267.
- 430 LUO, W., WEISEL, F. & SHLOMCHIK, M. J. 2018. B Cell Receptor and CD40 Signaling Are  
431 Rewired for Synergistic Induction of the c-Myc Transcription Factor in Germinal Center  
432 B Cells. *Immunity*, 48, 313-326 e5.
- 433 MESIN, L., ERSCHING, J. & VICTORA, G. D. 2016. Germinal Center B Cell Dynamics.  
434 *Immunity*, 45, 471-482.
- 435 MUELLER, J., MATLOUBIAN, M. & ZIKHERMAN, J. 2015. Cutting edge: An in vivo  
436 reporter reveals active B cell receptor signaling in the germinal center. *J Immunol*, 194,  
437 2993-7.
- 438 NOWOSAD, C. R., SPILLANE, K. M. & TOLAR, P. 2016. Germinal center B cells recognize  
439 antigen through a specialized immune synapse architecture. *Nat Immunol*, 17, 870-7.
- 440 PULENDRAN, B., KANNOURAKIS, G., NOURI, S., SMITH, K. G. & NOSSAL, G. J. 1995.  
441 Soluble antigen can cause enhanced apoptosis of germinal-centre B cells. *Nature*, 375,  
442 331-4.
- 443 ROOKHUIZEN, D. C. & DEFRANCO, A. L. 2014. Toll-like receptor 9 signaling acts on  
444 multiple elements of the germinal center to enhance antibody responses. *Proc Natl Acad  
445 Sci U S A*, 111, E3224-33.
- 446 SHLOMCHIK, M. J. & WEISEL, F. 2012. Germinal centers. *Immunol Rev*, 247, 5-10.
- 447 SHOKAT, K. M. & GOODNOW, C. C. 1995. Antigen-induced B-cell death and elimination  
448 during germinal-centre immune responses. *Nature*, 375, 334-8.
- 449 SILVA, M., NGUYEN, T. H., PHILBROOK, P., CHU, M., SEARS, O., HATFIELD, S.,  
450 ABBOTT, R. K., KELSOE, G. & SITKOVSKY, M. V. 2017. Targeted Elimination of  
451 Immunodominant B Cells Drives the Germinal Center Reaction toward Subdominant  
452 Epitopes. *Cell Rep*, 21, 3672-3680.
- 453 SILVER, J., ZUO, T., CHAUDHARY, N., KUMARI, R., TONG, P., GIGUERE, S.,  
454 GRANATO, A., DONTHULA, R., DEVEREAUX, C. & WESEMANN, D. R. 2018.  
455 Stochasticity enables BCR-independent germinal center initiation and antibody affinity  
456 maturation. *J Exp Med*, 215, 77-90.
- 457 TAKAHASHI, Y., DUTTA, P. R., CERASOLI, D. M. & KELSOE, G. 1998. In situ studies of  
458 the primary immune response to (4-hydroxy-3-nitrophenyl)acetyl. V. Affinity maturation  
459 develops in two stages of clonal selection. *J Exp Med*, 187, 885-95.
- 460 TURNER, J. S., BENET, Z. L. & GRIGOROVA, I. 2017a. Transiently antigen primed B cells  
461 can generate multiple subsets of memory cells. *PLoS One*, 12, e0183877.
- 462 TURNER, J. S., BENET, Z. L. & GRIGOROVA, I. L. 2017b. Antigen Acquisition Enables  
463 Newly Arriving B Cells To Enter Ongoing Immunization-Induced Germinal Centers. *J  
464 Immunol*, 199, 1301-1307.
- 465 TURNER, J. S., MARTHI, M., BENET, Z. L. & GRIGOROVA, I. 2017c. Transiently antigen-  
466 primed B cells return to naive-like state in absence of T-cell help. *Nat Commun*, 8,  
467 15072.

- 468 VICTORA, G. D. & NUSSENZWEIG, M. C. 2012. Germinal centers. *Annu Rev Immunol*, 30,  
469 429-57.
- 470 VICTORA, G. D., SCHWICKERT, T. A., FOOKSMAN, D. R., KAMPHORST, A. O.,  
471 MEYER-HERMANN, M., DUSTIN, M. L. & NUSSENZWEIG, M. C. 2010. Germinal  
472 center dynamics revealed by multiphoton microscopy with a photoactivatable fluorescent  
473 reporter. *Cell*, 143, 592-605.
- 474 VICTORATOS, P., LAGNEL, J., TZIMA, S., ALIMZHANOV, M. B., RAJEWSKY, K.,  
475 PASPARAKIS, M. & KOLLIAS, G. 2006. FDC-specific functions of p55TNFR and  
476 IKK2 in the development of FDC networks and of antibody responses. *Immunity*, 24, 65-  
477 77.
- 478 WANG, X., CHO, B., SUZUKI, K., XU, Y., GREEN, J. A., AN, J. & CYSTER, J. G. 2011.  
479 Follicular dendritic cells help establish follicle identity and promote B cell retention in  
480 germinal centers. *J Exp Med*, 208, 2497-510.
- 481

482

483

484

485

486

487

488

489

490

491

492

493

494

495

496

497

498 **Figures**

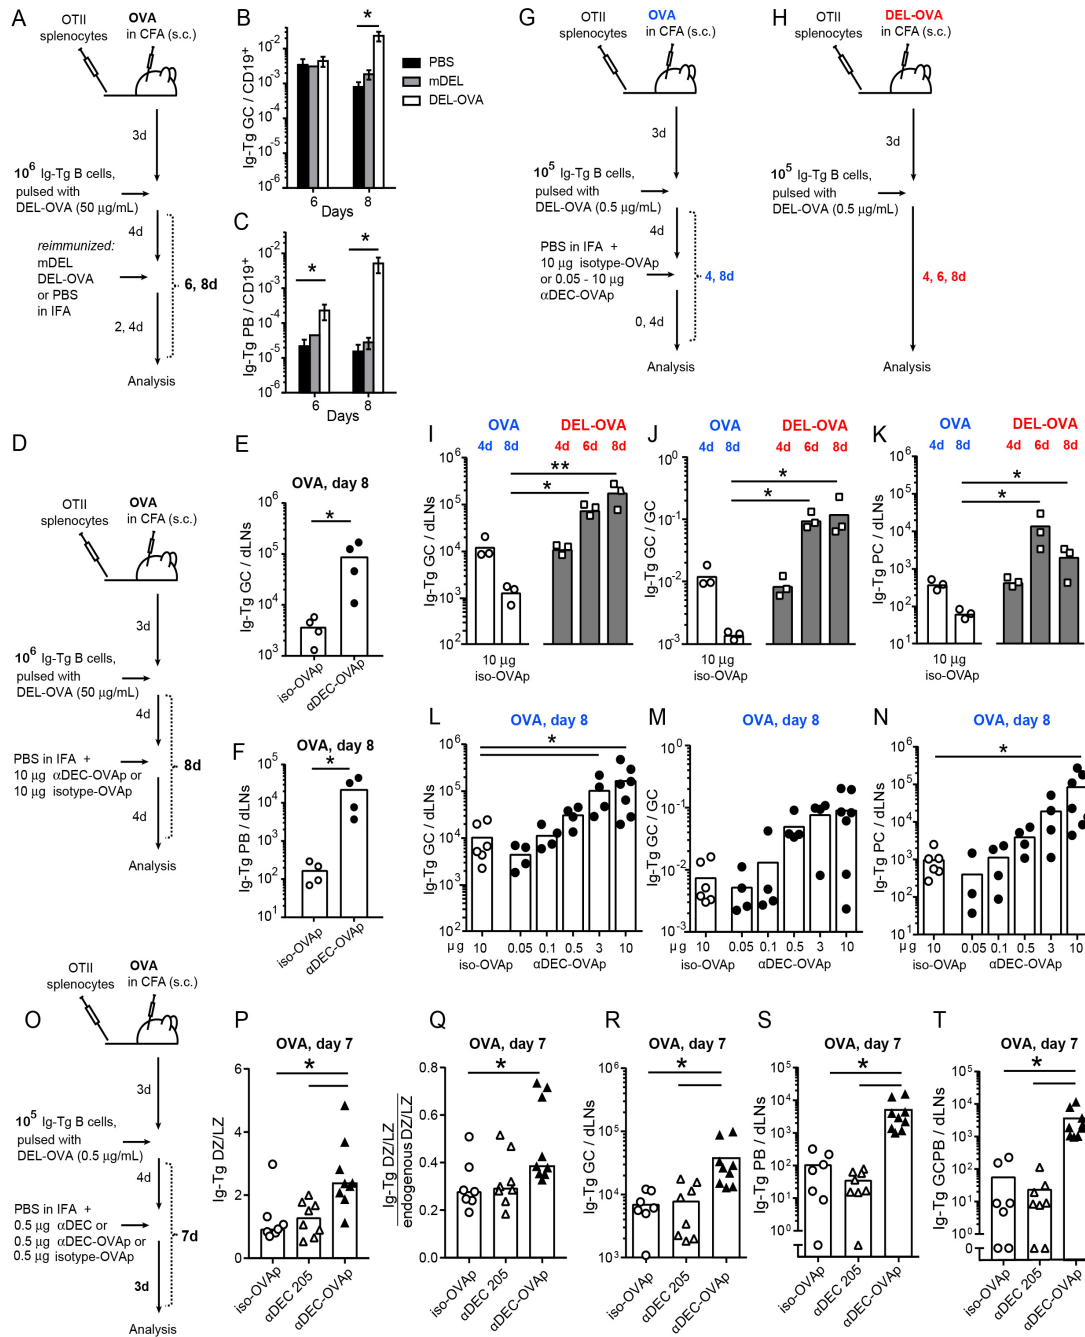

499

500

**Figure 1. T cell help is sufficient for GC B cell selection and PB differentiation. A,**

501

Experimental outline for **B, C**. Purified Hy10 Ig-Tg B cells were pulsed *ex vivo* for 5 min with

502

50  $\mu$ g/mL DEL-OVA, washed, and  $10^6$  were transferred to recipient B6 mice preinjected with

503 splenocytes containing  $5 \times 10^5$  OTII Th cells and subcutaneously (s.c.) preimmunized with OVA  
504 in CFA. Four days after Ig-Tg transfer, recipient mice were s.c. re-immunized with mDEL, DEL-  
505 OVA, or PBS in IFA. **B, C** Accumulation of Ig-Tg GC (**B**) and PBs (**C**) per  $CD19^+$  cells in the  
506 dLNs of re-immunized recipient mice at 2 and 4d post reimmunization (6 and 8d post Ig-Tg B  
507 cell transfer). See also **Fig. S1A-E. D**, Experimental outline for **E, F**.  $10^6$   $50 \mu\text{g/ml}$  DEL-OVA  
508 pulsed Ig-Tg B cells were recruited into GCs as in **A**, and 4 d.p.t. recipient mice were s.c. re-  
509 immunized with PBS in IFA and injected with  $10 \mu\text{g}$  of  $\alpha\text{DEC-OVAp}$  or iso-OVAp. **E, F**, Ig-Tg  
510 GC (**E**) and PB (**F**) accumulation in dLNs from mice that received  $10 \mu\text{g}$  iso-OVAp (open  
511 symbols) or  $\alpha\text{DEC-OVAp}$  (closed symbols) 4d earlier. See also **Fig. S1F. G**, Experimental  
512 outline for **I-N**.  $10^5$   $0.5 \mu\text{g/ml}$  DEL-OVA pulsed Ig-Tg B cells were recruited into GCs as in **A**,  
513 and 4 d.p.t. recipient mice were s.c. re-immunized with PBS in IFA and injected the indicated  
514 amount of  $\alpha\text{DEC-OVAp}$  or iso-OVAp. **H**, Experimental outline for **I-K**. Recipient mice were  
515 injected with OTII splenocytes as in **A** and s.c. immunized with DEL-OVA in CFA.  $10^5$   
516  $0.5 \mu\text{g/ml}$  DEL-OVA pulsed Ig-Tg B cells were transferred as in **G** and dLNs analyzed at  
517 indicated time points. **I, L**, Ig-Tg GC B cell accumulation in dLNs. **J, M**, Fraction of Ig-Tg GC  
518 B cells in GCs. **K, N**, Ig-Tg PB accumulation in dLNs. See also **Fig. S1G, H. O**, Experimental  
519 outline for **P-T**. Mice were treated as in **G** and at 4d post Ig-Tg cell transfer reimmunized with  
520 PBS in IFA and s.c. injected with  $0.5 \mu\text{g}$   $\alpha\text{DEC-OVAp}$ , iso-OVAp, or unconjugated  $\alpha\text{DEC-205}$   
521 for analysis 3 days later (7 days after Ig-Tg cell transfer). **P**, Ig-Tg GC DZ to LZ ratio. **Q**, Ig-Tg  
522 DZ to LZ ratio normalized to the endogenous GC DZ to LZ cell ratio. **R**, Ig-Tg GC B cells  
523 accumulation in dLNs. **S, T**, Ig-Tg PB (**S**), and GCPB (**T**) accumulation in dLNs. See also **Fig.**  
524 **S1I-O. B, C**, Data from 3–5 independent experiments, 3–6 mice per condition, shown as mean  $\pm$   
525 SEM. \*  $p < 0.05$ , Kruskal-Wallis with Dunn's post test between PBS, mDEL, or DEL-OVA. **E–T**,

526 Data from 2–4 independent experiments. Each symbol represents one mouse. \*,  $p < 0.05$ , Mann-  
527 Whitney test (**E, F**) or Kruskal-Wallis with Dunn’s post test between isotype and each  $\alpha$ DEC-  
528 OVAp dose (**I-N**), or between all conditions (**P-T**).

529

530

531

532

533

534

535

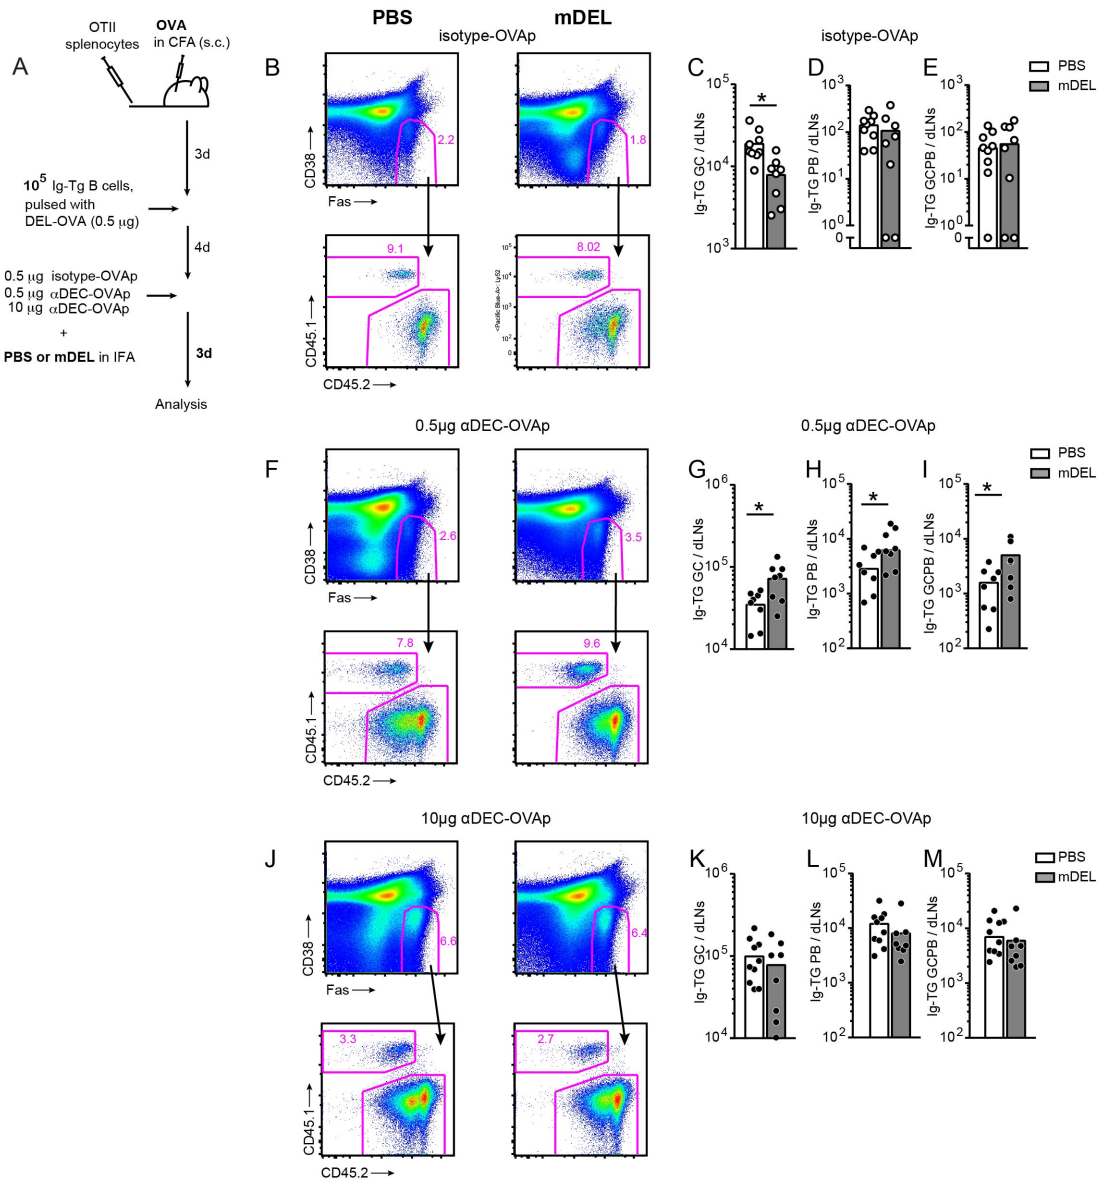

536

537

**Figure 2. BCR Cross-linking promotes GC and PB response when T cell help is sub-**

538

**saturating.** **A**, Experimental outline. 0.5  $\mu$ g/mL DEL-OVA pulsed Ig-Tg B cells were recruited

539

into GC responses as in **Fig. 1G**. 4 d.p.t., recipient mice were s.c. re-immunized with PBS or 50

540

$\mu$ g mDEL in IFA and injected with 0.5 $\mu$ g iso-OVAp or with 0.5 $\mu$ g or 10 $\mu$ g  $\alpha$ DEC-OVAp. **B-K**,

541

Representative examples of GC B cell gating analysis of Ig<sup>+</sup> CD3<sup>-</sup> lymphocytes in dLNs at 3

542

days post reimmunization (7 days post Ig-Tg cell transfer) (in **B, F, J**) and accumulation of Ig-Tg

543

GC B cells (**C, G, K**), PB (**D, H, L**) and GCPB (**E, I, M**) in dLNs. Data from 2–4 independent



544 experiments. Each symbol represents one mouse. \*,  $p < 0.05$ , Mann-Whitney test. See also **Fig.**

545 **S2.**

546

547

548

549

550

551

552

553

554

555

556

557

558

559

560

561

562

563



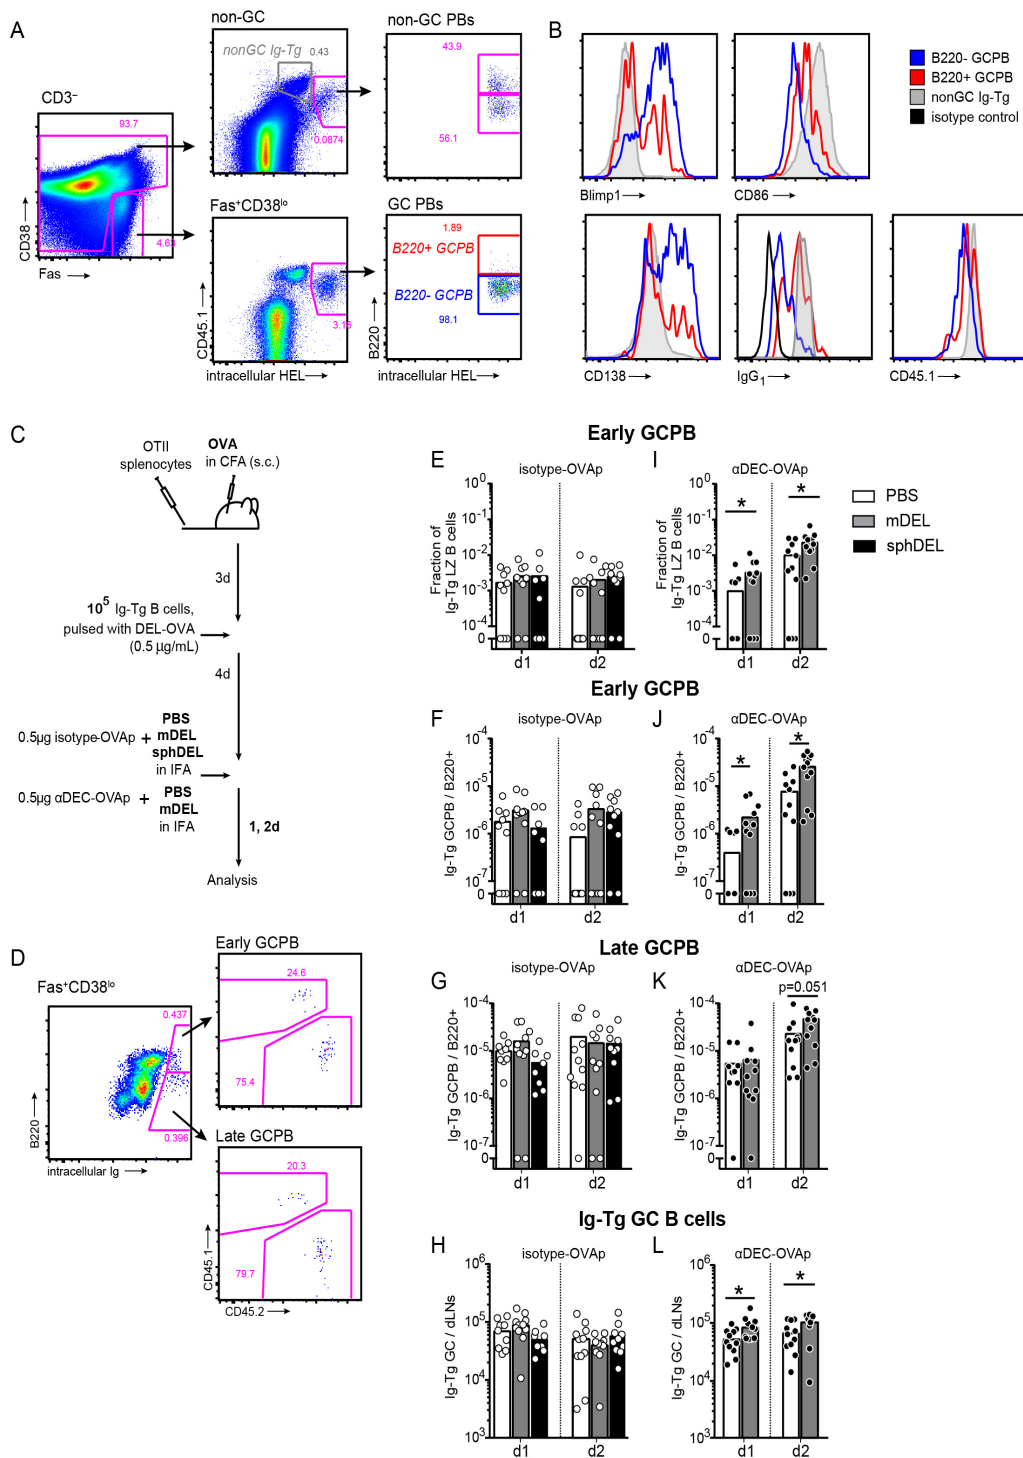

564

565 **Figure 3. BCR cross-linking enhances early PB differentiation when T cell help is sub-**

566 **saturating.** **A**, Gating strategy for Ig-Tg early and late PBs and GCPBs.  $10^5$  Blimp1<sup>yfp</sup> or regular

567 CD45.1<sup>pos</sup> Ig-Tg B cells were transferred to B6 recipient mice, which were immunized s.c. with

568 50 $\mu$ g DEL-OVA. dLNs were analyzed 10 d.p.i. **B**, representative histograms of Blimp1, CD86,  
569 CD138, surface IgG<sub>1</sub>, and CD45.1 in B220<sup>+</sup>(red) and B220<sup>lo</sup> (blue) GCPBs and non-GC Ig-Tg B  
570 cells (grey). For IgG<sub>1</sub> staining non-GC B cells were gated on IgG<sub>1</sub><sup>pos</sup> cells. Data representative of  
571 2-3 independent experiments with 13 mice. **C**, Experimental outline for **D-L**. 0.5  $\mu$ g/mL DEL-  
572 OVA pulsed Ig-Tg B cells were recruited into GC responses as in **Fig. 1G**. Four d.p.t., recipient  
573 mice were s.c. re-immunized with PBS, 50  $\mu$ g mDEL or sphDEL in IFA and injected with 0.5 $\mu$ g  
574 iso-OVAp or  $\alpha$ DEC-OVAp. **D**, Representative gating example for Ig-Tg and endogenous B220<sup>+</sup>  
575 early GCPBs and B220<sup>lo</sup> late GCPBs. **E-L**, accumulation of B220<sup>+</sup> early (**E-J**) and B220<sup>lo</sup> late  
576 (**G, K**) GCPBs and GC B cells (**H, L**) in dLNs 1d and 2d post reimmunization. Data from 4  
577 independent experiments. Each symbol represents one mouse. \*, p<0.05, Kruskal-Wallis with  
578 Dunn's post test between PBS and mDEL or sphDEL (left column), or Mann-Whitney test. See  
579 also **Fig. S3**.

580

581

582

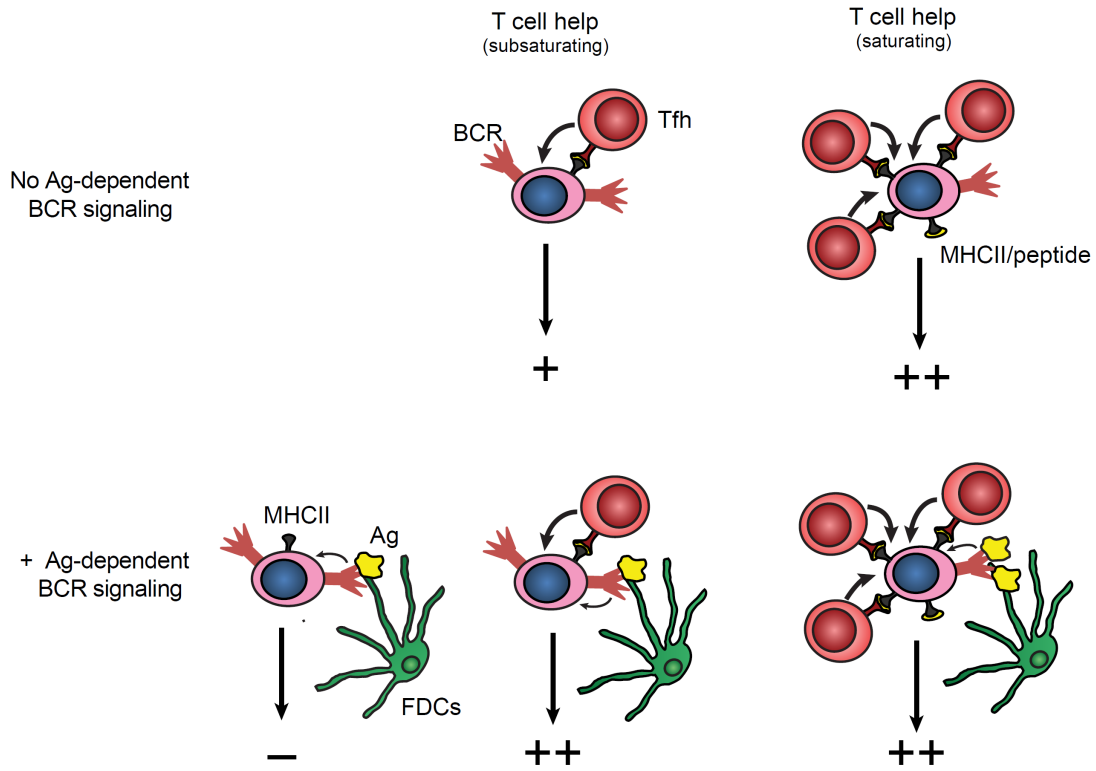

583

584 **Figure 4. Model of GC B cell selection.**

585

585 **Supplementary Figures**

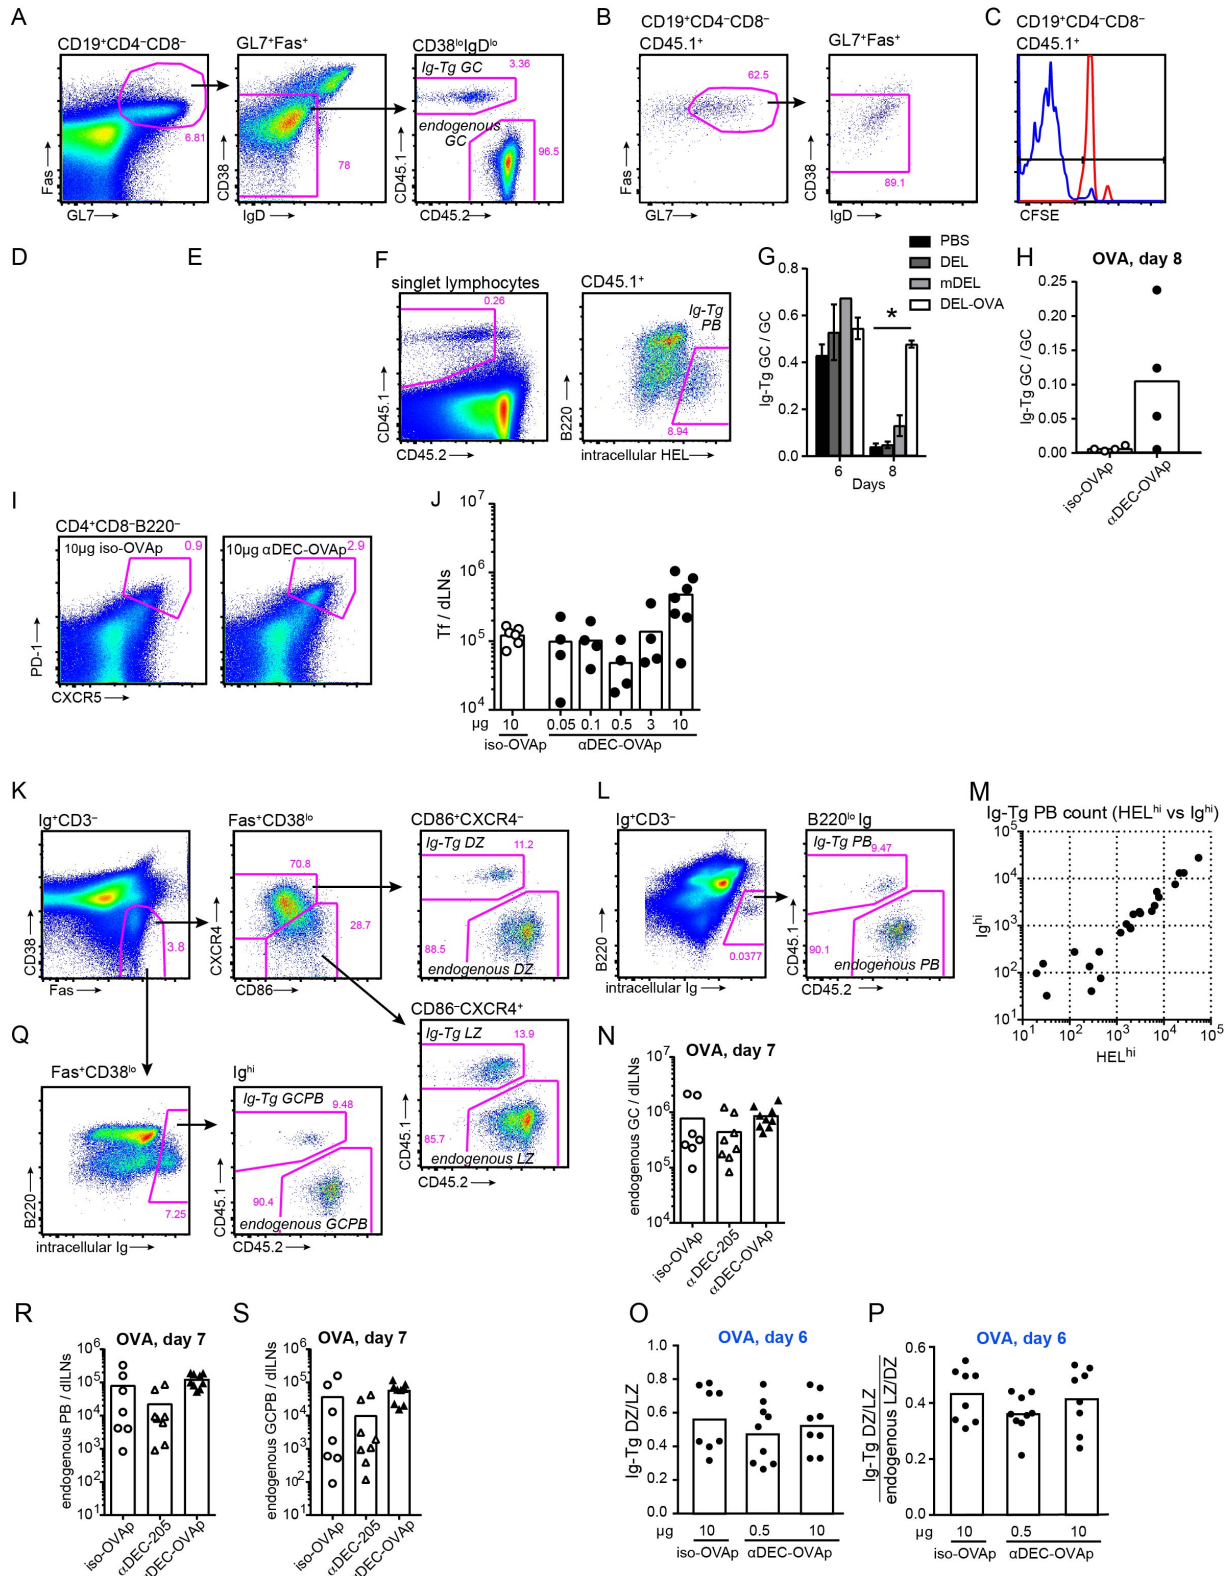

586  
587

**Figure S1. T cell help is sufficient for GC B cell selection and PB differentiation. A, D,**

588 Gating strategy for Ig-Tg and endogenous GC B cells (**A**) and Ig-Tg PBs (**D**). **B**, **C**,  
589 Representative plots of Ig-Tg GC participation (**B**) and proliferation (**C**) 4 d.p.t. according to the  
590 experimental design in **Fig. 1A**. Red line (ctrl) in **C** is from DEL-OVA pulsed Ig-Tg B cells  
591 transferred into unimmunized recipient mice. Representative of 3–5 independent experiments, 3–  
592 6 mice per condition. **E**, **F**, Ig-Tg GC B cells fraction of total GC cells analysis of the  
593 experiments shown in **Fig. 1A**, **B** (in **E**) and **Fig. 1D**, **E** (in **F**). **G**, **H**, Representative flow plots  
594 (**G**) and enumeration (**H**) of follicular CD4 T cells in dLNs of mice reimmunized with PBS in  
595 IFA and injected with 10 $\mu$ g iso-OVAp and  $\alpha$ DEC-OVAp 4d earlier, according to the  
596 experimental design in **Fig. 1G**. **I**, **J**, **O**, gating strategies for Ig-Tg and endogenous DZ and LZ  
597 GC B cells (**I**), PB (**L**) and GCPB (**O**). **K**, Numbers of Ig-Tg PBs as determined by intracellular  
598 HEL and Ig staining recovered from dLNs of mice treated according to the experimental design  
599 in **Fig. 1G**. Data from 2 independent experiments. Each symbol represents one mouse. **L–N**,  
600 Endogenous GC (**L**), PB (**M**), and GCPB (**N**) accumulation in dLNs of recipient mice  
601 reimmunized with PBS and injected with 0.5 $\mu$ g iso-OVAp (open circles), unconjugated  $\alpha$ DEC-  
602 205 (open triangles), or  $\alpha$ DEC-OVAp (closed triangles) 3d earlier according to the experimental  
603 design in **Fig. 1O**. Data from 4 independent experiments. Each symbol represents one mouse.  
604 Kruskal-Wallis with Dunn’s post test between all conditions. **P**, **Q**, Analysis of Ig-Tg GC DZ to  
605 LZ cell ratio (in **P**) and Ig-Tg DZ/LZ ratio normalized to endogenous DZ/LZ GC B cell ratio (in  
606 **Q**) in experiment performed according to the experimental scheme in **Fig. 1G** and analyzed at 2d  
607 post administration of iso-OVAp and  $\alpha$ DEC-OVAp (or 6 days post Ig-Tg B cell transfer).  
608  
609

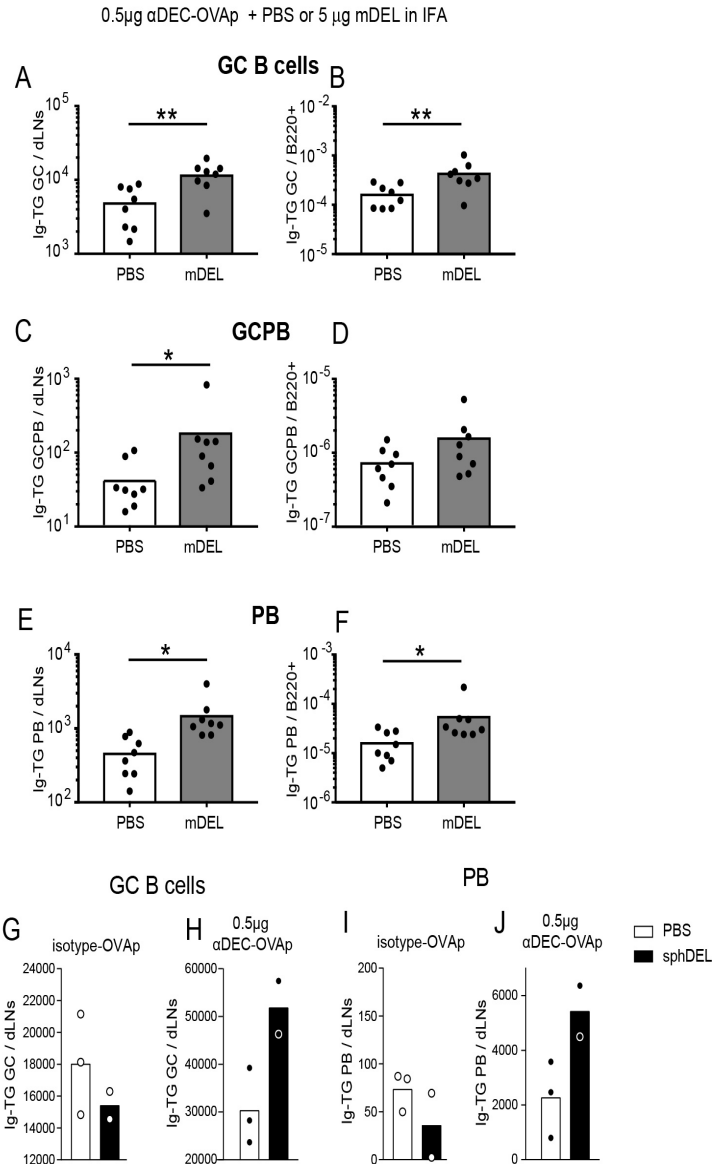

610  
 611 **Figure S2. BCR Cross-linking promotes GC and PB response when T cell help is sub-**  
 612 **saturating. A-F**, Experimental design is similar to that in **Fig. 2A**, with recipient mice injected  
 613 with 0.5 $\mu$ g  $\alpha$ DEC-OVAp and s.c. reimmunized with PBS or 5  $\mu$ g mDEL in IFA. Analysis of Ig-  
 614 Tg GCs (**A, B**), GCPB (**C, D**) and PB (**E, F**) accumulation in dLNs (**A, C, E**) and per B220<sup>+</sup>  
 615 cells (**B, D, F**). Data from 2 independent experiments. Each symbol represents one mouse. \*,  
 616 p<0.05, \*\*, p<0.01, Mann-Whitney test. **G-J**, Experimental design as in **Fig. 2A**, with recipient  
 617 mice s.c. reimmunized with PBS or sphDEL in IFA and injected with 0.5 $\mu$ g iso-OVAp or  $\alpha$ DEC-

618 OVAp. Ig-Tg GC (G, H) and PB (I, J) accumulation in dLNs from mice reimmunized with PBS  
 619 (white bars) or sphDEL (black bars). Data from 2–3 independent experiments, with 4–8 mice per  
 620 condition. Each symbol represents one experiment.  
 621

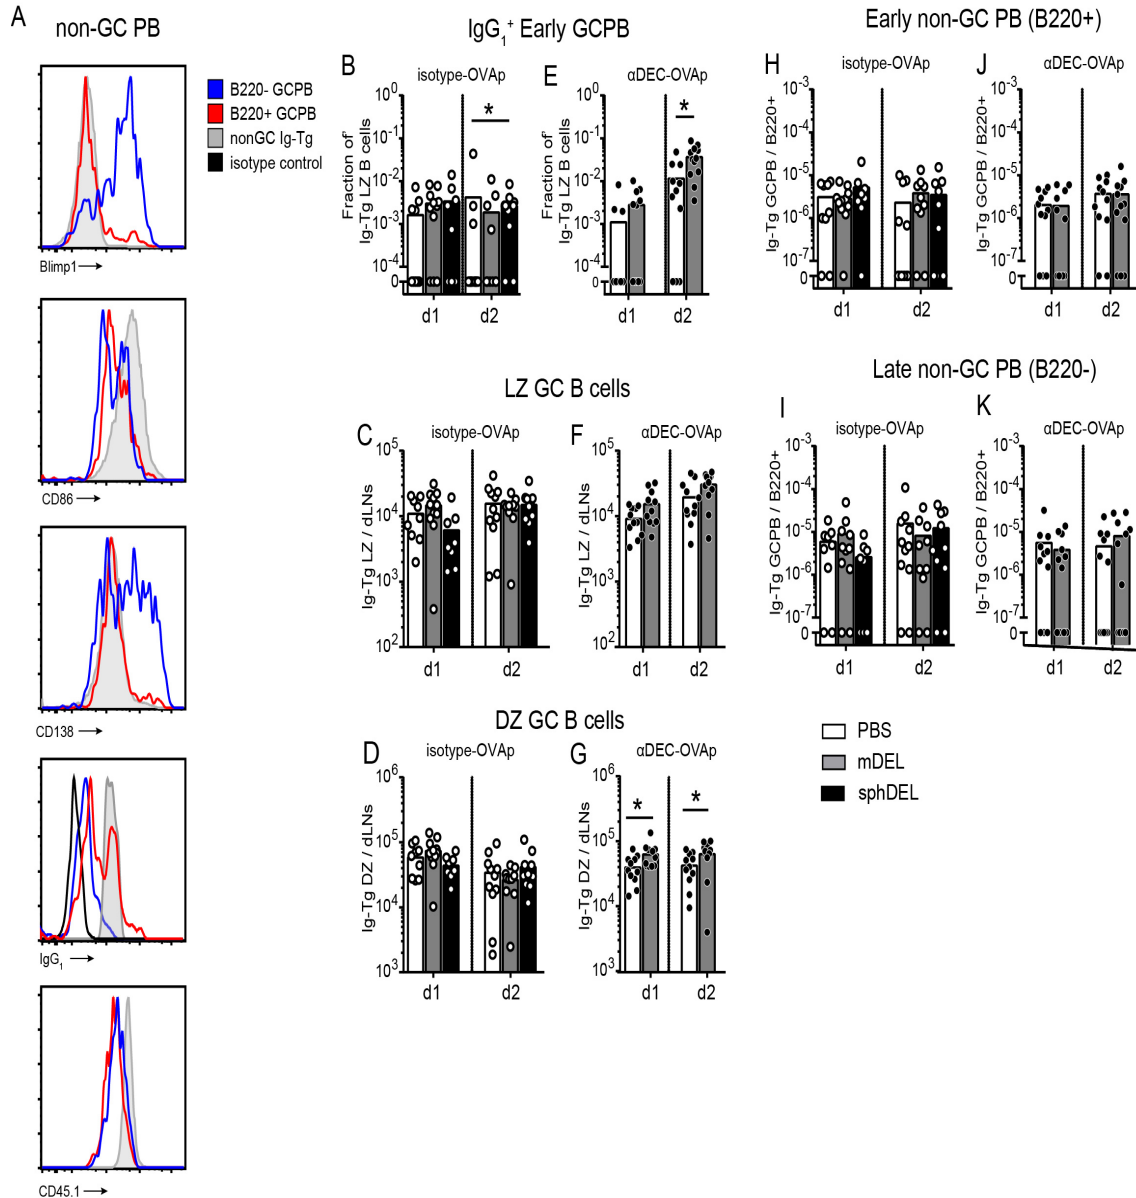

622

623 **Figure S3. BCR cross-linking enhances early PB differentiation when T cell help is sub-**

624 **saturating.** A, representative histograms of Blimp1, CD86, CD138, surface IgG<sub>1</sub>, and CD45.1

625 in B220<sup>+</sup>(red) and B220<sup>lo</sup> (blue) GCPBs and non-GC Ig-Tg B cells (grey). For IgG<sub>1</sub> staining non-  
626 GC B cells were gated on IgG<sub>1</sub><sup>pos</sup> cells. See **Fig. 3A** for gating strategy. Data representative of 2-  
627 3 independent experiments. **B-K**, See **Fig. 3C** for experimental design. Accumulation of IgG<sub>1</sub><sup>+</sup>  
628 Ig-Tg early (B220<sup>+</sup>) GCPBs as a fraction of IgG<sub>1</sub><sup>pos</sup> LZ B cells (in **B, E**). Ig-Tg LZ (**C, F**) and  
629 DZ (**D, G**) GC B cells. Early B220<sup>+</sup> (**H, J**) and late B220<sup>lo</sup> (**I, K**) non-GC Ig-Tg PB in dLNs 1d  
630 and 2d post reimmunization. Data from 4 independent experiments. Each symbol represents one  
631 mouse. \*, p<0.05, Kruskal-Wallis with Dunn's post test between PBS and mDEL or sphDEL  
632 (left panels), or Mann-Whitney test.

633

634

635
